# Supplementary material for: Phylogenetic relationships and taxonomic position of genus Hyperacrius (Rodentia: Arvicolinae) from Kashmir based on evidences from analysis of mitochondrial genome and study of skull morphology
Source: PeerJ. 2020 Nov 18;8:e10364. doi: 10.7717/peerj.10364 (PMC7680025; doi:10.7717/peerj.10364)
Supplement: Supplemental Information 5 [file peerj-08-10364-s005.xlsx]

## Sheet: Лист1
	Table S1. Information regarding the taxa included in this study
	Tribe	Genus	Species	Accession No	Sequence description	Source
	Ondatrini	Ondatra	zibethicus	NC_036035	complete mitochondrial genome	[1]
	Dicrostonychini	Dicrostonyx	torquatus	NC_034646	complete mitochondrial genome	[2]
	Lemmini	Lemmus	trimucronatus	AF119276	cytochrome b gene, complete cds	[3]
	Clethrionomyini (=Myodini)	Alticola	albicaudus	KJ556726	cytochrome b gene, complete cds	[4]
			argentatus	KJ556627	cytochrome b gene, complete cds	[4]
			barakshin	KJ556637	cytochrome b gene, 1128 bp fragment	[4]
			lemminus	KJ556621	cytochrome b gene, complete cds	[4]
			semicanus	KJ556615	cytochrome b gene, complete cds	[4]
			strelzowi	KJ556694	cytochrome b gene, complete cds	[4]
		Clethrionomys	californicus	KJ556722	cytochrome b gene, 1088 bp fragment	[4]
			centralis	KJ556625	cytochrome b gene, 1114 bp fragment	[4]
			gapperi	KJ789561	cytochrome b gene, complete cds	[5]
			glareolus	NC_024538	complete mitochondrial genome	[6]
			rutilus	KJ789404	cytochrome b gene, complete cds	[5]
		Craseomys	andersoni	KJ556705	cytochrome b gene, complete cds	[4]
			rufocanus	NC_029477	complete mitochondrial genome	[7]
			regulus	JN629046	complete mitochondrial genome	[8]
			smithii	KJ556699	cytochrome b gene, 1112 bp fragment	[4]
		Caryomys	eva	KJ556716	cytochrome b gene, 1122 bp fragment	[4]
			inez	KU200225	complete mitochondrial genome	[9]
		Eothenomys	chinensis	NC_013571	complete mitochondrial genome	[10]
			melanogaster	NC_027418	complete mitochondrial genome	[11]
			miletus	NC_030330	complete mitochondrial genome	[12]
			proditor	KJ556719	cytochrome b gene, 1109 bp fragment	[4]
	Ellobiusini	Ellobius	alaicus	MK544913	cytochrome b gene, complete cds	[13]
			fuscocapillus	MT483991	complete mitochondrial genome	[14]
			lutescens	MT483992	complete mitochondrial genome	[14]
			talpinus	MT483993	complete mitochondrial genome	[14]
			tancrei	AF119270	cytochrome b gene, complete cds	[3]
	Lagurini	Eolagurus	luteus	MK750945	cytochrome b gene, 1140 bp fragment	[15]
		Lagurus	lagurus	AF429818	cytochrome b gene, 1092 bp fragment	[16]
	Arvicolini	Arvicola	amphibius	MN122828	complete mitochondrial genome	unpublished
		Alexandromys	fortis	NC_015241	complete mitochondrial genome	[17]
			kikuchii	NC_003041	complete mitochondrial genome	[18]
		Chionomys	gud	JN244696	cytochrome b gene, 1140 bp fragment	[19]
			nivalis	JX440342	cytochrome b gene, 1140 bp fragment	[19]
		Lasiopodomys	gregalis	MN199170	complete mitochondrial genome	[20]
			mandarinus	NC_025283	complete mitochondrial genome	[21]
		Microtus	agrestis	NC_041250	complete mitochondrial genome	[22]
			arvalis	NC_038176	complete mitochondrial genome	[23]
			levis	NC_008064	complete mitochondrial genome	[24]
			ochrogaster	NC_027945	complete mitochondrial genome	[25]
		Neodon	fuscus	NC_040138	complete mitochondrial genome	[26]
			irene	NC_016055	complete mitochondrial genome	[27]
			sikimensis	NC_035503	complete mitochondrial genome	[28]
		Proedromys	liangshanensis	NC_013563	complete mitochondrial genome	[29]
		Terricola	subterraneus	MN326840	complete mitochondrial genome	[30]
	Incertae sedis	Hyperacrius	fertilis	MT433094	complete mitochondrial genome	this study
			fertilis	KJ556725	cytochrome b gene, 810bp fragment	[4]
1	Zhao H, Qi X, Li C. 2018. Complete mitochondrial genome of the muskrat (Ondatra zibethicus) and its unique phylogenetic position estimated in Cricetidae. Mitochondrial DNA Part B 3: 296–298
2	Fedorov VB, Goropashnaya AV. 2016. Complete mitochondrial genome of the Eurasian collared lemming Dicrostonyx torquatus Pallas, 1779 (Rodentia: Arvicolinae). Mitochondrial DNA Part B 1: 824–825
3	Conroy CJ, Cook JA. 1999. MtDNA Evidence for Repeated Pulses of Speciation Within Arvicoline and Murid Rodents. Journal of Mammalian Evolution 6: 221–245
4	Kohli BA, Speer KA, Kilpatrick CW, Batsaikhan N, Damdinbaza D, Cook JA. 2014. Multilocus systematics and non-punctuated evolution of Holarctic Myodini (Rodentia: Arvicolinae). Molecular Phylogenetics and Evolution 76: 18-29
5	Kohli BA, Fedorov VB, Waltari E, Cook JA. 2015. Phylogeography of a Holarctic rodent (Myodes rutilus): testing high-latitude biogeographical hypotheses and the dynamics of range shifts J. Biogeogr. 42 (2): 377-389
6	Bendová K, Marková S, Searle JB, Kotlík P. 2016. The complete mitochondrial genome of the bank vole Clethrionomys glareolus (Rodentia: Arvicolinae). Mitochondrial DNA Part A 27: 111–112
7	Lu T, Zhu M, Yi C, Si C, Yang C, Chen H. 2017. Complete mitochondrial genome of the gray red-backed vole (Myodes rufocanus) and a complete estimate of the phylogenetic relationships in Cricetidae. Mitochondrial DNA Part A 28(1): 62-64
8	Kim HR, Park YC. 2012. The complete mitochondrial genome of the Korean red-backed vole, Myodes regulus (Rodentia, Murinae) from Korea. Mitochondrial DNA 23: 148–150
9	Yu P, Kong L, Li Y, Cong H, Li Y. 2016. Analysis of complete mitochondrial genome and its application to phylogeny of Caryomys inez (Rodentia: Cricetidae: Arvicolinae). Mitochondrial DNA Part B 1: 343–344
10	Yang C, Hao H, Liu S, Liu Y, Yue B, Zhang X. 2012. Complete mitochondrial genome of the Chinese oriental vole Eothenomys chinensis (Rodentia: Arvicolinae). Mitochondrial DNA 23(2): 131-133
11	Chen S, Chen G, Wei H, Wang Q. 2016. Complete mitochondrial genome of the Père David’s Vole, Eothenomys melanogaster (Rodentia: Arvicolinae). Mitochondrial DNA. Part A, DNA mapping, Seq. Anal. 27: 2496–2497
12	Mu Y, Duan Y, Di Z, Wang Z, Wanlong Z. 2019. The complete mitochondrial genome of the Yunnan red-backed vole Eothenomys miletus (Rodentia: Cricetidae) and its phylogeny. Mitochondrial DNA Part B 4: 1424–1425
13	Bakloushinskaya I, Lyapunova EA, Saidov AS, Romanenko SA, O'Brien PCM, Serdyukova NA, Ferguson-Smith MA, Matveevsky S, Bogdanov AS. 2019. Rapid chromosomal evolution in enigmatic mammal with XX in both sexes, the Alay mole vole Ellobius alaicus Vorontsov et al., 1969 (Mammalia, Rodentia). Comp Cytogenet 13 (2): 147-177
14	Bondareva OV, Mahmoudi A, Bodrov SYu, Genelt-Yanovskiy EA, Petrova TV, Abramson NI. 2020. The complete mitochondrial genomes of three Ellobius mole vole species (Rodentia: Arvicolinae), Mitochondrial DNA Part B 5(3): 2485-2487
15	Bannikova AA, Lebedev VS, Poplavskaya NS, Simanovsky SA, Undrakhbayar E, Adiya Y, Surov AS. 2019. Phylogeny and phylogeography of arvicoline and lagurine voles of Mongolia. Folia Zool. Brno 68(2): 100-113
16	Dekonenko A, Yakimenko V, Ivanov A, Morozov V, Nikitin P, Khasanova S, Dzagurova T, Tkachenko E, Schmaljohn C. 2003. Genetic similarity of Puumala viruses found in Finland and western Siberia and of the mitochondrial DNA of their rodent hosts suggests a common evolutionary origin. Infect. Genet. Evol. 3(4): 245-257
17	Jiang X, Gao J, Ni L, Hu J, Li K, Sun F, Xie J, Bo X, Gao C, Xiao J, Zhou Y. 2012. The complete mitochondrial genome of Microtus fortis calamorum (Arvicolinae, Rodentia) and its phylogenetic analysis. Gene 498(2): 288-295
18	Lin YH, Waddell PJ, Penny D. 2002. Pika and vole mitochondrial genomes increase support for both rodent monophyly and glires. Gene 294, 119–129
19	Bannikova AA, Sizhazheva AM, Malikov VG, Golenishchev FN, Dzuev RI. 2013. Genetic diversity of Chionomys genus (Mammalia, Arvicolinae) and comparative phylogeography of snow voles. Genetika 49(5):649-664
20	Baca M, Popović D, Lemanik A, Baca K, Horáček I, Nadachowski A. 2019. Highly divergent lineage of narrow-headed vole from the Late Pleistocene Europe. Sci Rep 9:17799
21	Cong H, Kong L, Liu Z, Wu Y, Motokawa M, Harada M, Li Y. 2016. Complete mitochondrial genome of the mandarin vole Lasiopodomys mandarinus (Rodentia: Cricetidae). Mitochondrial DNA Part A, 27(1): 760-761
22	Jiang JQ, Wu SX, Chen JJ, Liu CZ. 2018. Characterization of the complete mitochondrial genome of short-tailed field vole, Microtus agrestis. Mitochondrial DNA Part B 3: 845–846
23	Folkertsma R, Westbury MV, Eccard JA, Hofreiter M. 2018. The complete mitochondrial genome of the common vole, Microtus arvalis (Rodentia: Arvicolinae). Mitochondrial DNA Part B 3: 446–447
24	Triant DA, DeWoody JA. 2006. Accelerated molecular evolution in Microtus (Rodentia) as assessed via complete mitochondrial genome sequences. Genetica 128: 95–108
25	Cao W, Xia Y, Dang X, Xu Q. 2016. The first complete mitochondrial genome of the Microtus ochrogaster. Mitochondrial DNA Part A 27: 3682–3683
26	Li JQ, Li L, Fu BQ, Yan HB, Jia WZ. 2019. Complete mitochondrial genomes confirm the generic placement of the plateau vole, Neodon fuscus. Biosci Rep 39 (8): BSR20182349
27	Fan L, Fan Z, Yue H, Zhang X, Liu Y, Sun Z, Liu S, Yue B. 2011. Complete mitochondrial genome sequence of the Chinese scrub vole (Neodon irene). Mitochondrial DNA 22(3): 50-52
28	Zhang Q, He T, Wei H, Li F, Feng Y, Zong H, Chen S. 2016. Characterization of the complete mitochondrial genome and phylogenetic relationship of Neodon sikimensis (Rodentia: Arvicolinae), Mitochondrial DNA Part B, 1(1): 445-446
29	Hao H, Liu S, Zhang X, Chen W, Song Z, Peng H, Liu Y, Yue B. 2011. Complete mitochondrial genome of a new vole Proedromys liangshanensis (Rodentia: Cricetidae) and phylogenetic analysis with related species: Are there implications for the validity of the genus Proedromys?, Mitochondrial DNA 22(1-2): 28-34
30	Bondareva OV, Abramson NI. 2019. The complete mitochondrial genome of the common pine vole Terricola subterraneus (Arvicolinae, Rodentia). Mitochondrial DNA Part B 4: 3925–3926
