# Supplementary material for: Phylogenetic relationships and taxonomic position of genus Hyperacrius (Rodentia: Arvicolinae) from Kashmir based on evidences from analysis of mitochondrial genome and study of skull morphology
Source: PeerJ. 2020 Nov 18;8:e10364. doi: 10.7717/peerj.10364 (PMC7680025; doi:10.7717/peerj.10364)
Supplement: Supplemental Information 6 [file peerj-08-10364-s006.xlsx]

## Sheet: Лист1
Table S2. Optimal partitioning scheme of the concatenated alignment of mitochondrial protein-coding genes obtained using PartitionFinder for the subsequent Bayesian and Maximum Likelihood phylogenetic analyses
Gene	Bayeasian analysis			Maximum Likelihood analysis
	Position 1	Position 2	Position 3	Position 1	Position 2	Position 3
ATP6	GTR+I+G	GTR+I+G	GTR+I+G	GTR+I+G	GTR+I+G	GTR+G
ATP8	TIM+G	TIM+G	TVM+I+G	GTR+I+G	GTR+I+G	GTR+G
COX1	GTR+I+G	GTR+I+G	GTR+I+G	SYM+I+G	GTR+I+G	GTR+G
COX2	GTR+I+G	GTR+I+G	GTR+I+G	SYM+I+G	GTR+I+G	GTR+G
COX3	GTR+I+G	GTR+I+G	GTR+I+G	SYM+I+G	GTR+I+G	GTR+G
CYTB	GTR+I+G	GTR+I+G	TVM+I+G	GTR+I+G	GTR+I+G	GTR+G
NAD1	GTR+I+G	GTR+I+G	GTR+I+G	GTR+I+G	GTR+I+G	GTR+G
NAD2	GTR+I+G	GTR+I+G	GTR+I+G	GTR+I+G	GTR+I+G	GTR+G
NAD3	GTR+I+G	GTR+I+G	GTR+I+G	GTR+I+G	GTR+I+G	GTR+G
NAD4	GTR+I+G	GTR+I+G	GTR+I+G	GTR+I+G	GTR+I+G	GTR+G
NAD4L	GTR+I+G	GTR+I+G	GTR+I+G	GTR+I+G	GTR+I+G	GTR+G
NAD5	GTR+I+G	GTR+I+G	GTR+I+G	GTR+I+G	GTR+I+G	GTR+G
NAD6	TIM+I+G	GTR+I+G	TRN+G	TIM+I+G	GTR+I+G	GTR+G
