# Supplementary material for: Phylogenetic relationships and taxonomic position of genus Hyperacrius (Rodentia: Arvicolinae) from Kashmir based on evidences from analysis of mitochondrial genome and study of skull morphology
Source: PeerJ. 2020 Nov 18;8:e10364. doi: 10.7717/peerj.10364 (PMC7680025; doi:10.7717/peerj.10364)
Supplement: Supplemental Information 7 [file peerj-08-10364-s007.xlsx]

## Sheet: Sheet1
Table S3. Hyperacrius fertilis mitochondrial genome annotation obtained using the MITOS web server and verified using Geneious Prime
Name	Type	Minimum	Maximum	Length	Direction
control region D-loop	D-loop	15392	16341	950	forward
trnP(cca)	tRNA	15324	15391	68	reverse
trnT(aca)	tRNA	15257	15323	67	forward
CYTB	gene	14112	15254	1143	forward
trnE(gaa)	tRNA	14038	14106	69	reverse
ND6	gene	13513	14037	525	reverse
ND5	gene	11705	13516	1812	forward
trnL1(cta)	tRNA	11636	11704	69	forward
trnS1(agc)	tRNA	11577	11635	59	forward
trnH(cac)	tRNA	11509	11576	68	forward
ND4	gene	10131	11508	1378	forward
ND4L	gene	9841	10137	297	forward
trnR(cga)	tRNA	9771	9839	69	forward
ND3	gene	9421	9768	348	forward
trnG(gga)	tRNA	9353	9420	68	forward
COX3	gene	8570	9353	784	forward
ATP6	gene	7890	8570	681	forward
ATP8	gene	7729	7932	204	forward
trnK(aaa)	tRNA	7665	7728	64	forward
COX2	gene	6978	7661	684	forward
trnD(gac)	tRNA	6910	6976	67	forward
trnS2(tca)	tRNA	6838	6906	69	reverse
COX1	gene	5302	6840	1539	forward
trnY(tac)	tRNA	5235	5299	65	reverse
trnC(tgc)	tRNA	5167	5234	68	reverse
trnN(aac)	tRNA	5066	5135	70	reverse
trnA(gca)	tRNA	4995	5063	69	reverse
trnW(tga)	tRNA	4927	4993	67	forward
ND2	gene	3891	4925	1035	forward
trnM(atg)	tRNA	3822	3890	69	forward
trnQ(caa)	tRNA	3748	3819	72	reverse
trnI(atc)	tRNA	3682	3750	69	forward
ND1	gene	2727	3683	957	forward
trnL2(tta)	tRNA	2652	2726	75	forward
16S rRNA	rRNA	1089	2651	1563	forward
trnV(gta)	tRNA	1017	1088	72	forward
12S rRNA	rRNA	68	1016	949	forward
trnF(ttc)	tRNA	1	66	66	forward
