# Supplementary material for: Phylogenetic relationships and taxonomic position of genus Hyperacrius (Rodentia: Arvicolinae) from Kashmir based on evidences from analysis of mitochondrial genome and study of skull morphology
Source: PeerJ. 2020 Nov 18;8:e10364. doi: 10.7717/peerj.10364 (PMC7680025; doi:10.7717/peerj.10364)
Supplement: Supplemental Information 8 [file peerj-08-10364-s008.xlsx]

## Sheet: 123
Table S4. Test of the Homogeneity of Substitution Patterns Between Sequences (see 2nd and 3rd sheet for other dataset results)
Test of the Homogeneity of Substitution Patterns Between Sequences on full alignment (1,2,3 codon positions) The probability of rejecting the null hypothesis that sequences have evolved with the same pattern of substitution, as judged from the extent of differences in base composition biases between sequences (Disparity Index test, [1]). A Monte Carlo test (500 replicates) was used to estimate th…
	H. fertilis cytb	A. stoliczkanus	A. tuvinicus	A. amphibius	C. rufocanus	H. fertilis	D. torquatus	E. chinensis	C. inez	E. melanogaster	E. miletus	C. regulus	L. gregalis	L. mandarinus	M. agrestis	M. arvalis	A. fortis	A. kikuchii	M. levis	M. ochrogaster	T. subterraneus	C. glareolus	N. fuscus	N. irene	N. sikimensis	O. zibethicus	P. liangshanensis
H. fertilis cytb		0	0.206434	0.150134	0	0.306971	0	0.0871314	0	0	0.100536	0	0	0.0643432	0.0281501	0	0.205094	0.0563003	0	0.0134048	0	0	0.344504	0	0	0.146113	0
A. stoliczkanus	1		0.205094	0.13807	0.0107239	0.160858	0	0.233244	0	0	0.168901	0.0254692	0.00670241	0.180965	0	0	0.245308	0.121984	0	0	0	0	0.163539	0	0.0214477	0.234584	0.0549598
A. tuvinicus	0.064	0.01		0.910188	0.0442359	0.918231	0.112601	0.0536193	0.041555	0.0871314	0	0.00670241	0	0	0.0723861	0.144772	0	0.395442	0.276139	0.524129	0.269437	0.331099	0	0.16756	0.0965147	0.859249	0.120643
A. amphibius	0.108	0.1	0		0.337802	0	0.146113	0.809651	0.340483	0.293566	0.816354	0.410188	0.581769	0.825737	0.33244	0.151475	0.974531	0.363271	0.184987	0	0.207775	0.0455764	0.935657	0.0764075	0.368633	0.0951743	0.441019
C. rufocanus	1	0.344	0.22	0.006		0.423592	0	0.0227882	0	0	0	0	0	0	0	0	0.0603217	0.124665	0.00402145	0.136729	0.0214477	0	0.115282	0	0	0.329759	0
H. fertilis	0.016	0.11	0	1	0.006		0.233244	1.03351	0.44504	0.412869	0.911528	0.49866	0.710456	0.987936	0.427614	0.234584	1.1622	0.664879	0.395442	0.0321716	0.412869	0.176944	0.800268	0.077748	0.564343	0.408847	0.676944
D. torquatus	1	1	0.108	0.132	1	0.06		0.0831099	0	0	0.0589812	0	0	0.0522788	0	0	0.144772	0.0321716	0	0	0	0	0.175603	0	0	0.183646	0
E. chinensis	0.166	0.01	0.206	0	0.306	0	0.168		0	0.0147453	0	0.00670241	0	0	0.0643432	0.126005	0	0.0790885	0.0737265	0.446381	0.0723861	0.19437	0.276139	0.213137	0	0.465147	0
C. inez	1	1	0.232	0.014	1	0.01	1	1		0	0	0	0	0	0	0	0.00670241	0.0321716	0	0.0817694	0	0	0.117962	0	0	0.261394	0
E. melanogaster	1	1	0.188	0.026	1	0.008	1	0.348	1		0.0603217	0	0	0	0	0	0.0482574	0	0	0.0495979	0	0	0.215818	0	0	0.159517	0
E. miletus	0.128	0.058	1	0	1	0	0.216	1	1	0.118		0	0	0	0.041555	0.0965147	0	0.225201	0.148794	0.451743	0.154155	0.205094	0.0509383	0.146113	0	0.654155	0.0120643
C. regulus	1	0.28	0.37	0.008	1	0	1	0.38	1	1	1		0	0	0	0	0.0147453	0.130027	0.0214477	0.180965	0.0321716	0.0254692	0.0817694	0	0	0.371314	0
L. gregalis	1	0.358	1	0.006	1	0	1	1	1	1	1	1		0	0	0	0	0.075067	0.0174263	0.265416	0.00536193	0.0495979	0.0951743	0.0670241	0	0.395442	0
L. mandarinus	0.23	0.118	1	0	1	0	0.248	1	1	1	1	1	1		0.0536193	0.132708	0	0.160858	0.132708	0.450402	0.100536	0.176944	0.159517	0.186327	0	0.550938	0
M. agrestis	0.334	1	0.202	0.028	1	0.006	1	0.22	1	1	0.256	1	1	0.28		0	0.0857909	0.0214477	0	0.0549598	0	0	0.171582	0.0147453	0	0.210456	0
M. arvalis	1	1	0.088	0.112	1	0.07	1	0.098	1	1	0.188	1	1	0.116	1		0.183646	0.0227882	0	0	0	0	0.22118	0	0	0.117962	0.00402145
A. fortis	0.054	0.036	1	0	0.204	0	0.104	1	0.342	0.258	1	0.31	1	1	0.166	0.05		0.214477	0.182306	0.55496	0.156836	0.27748	0.189008	0.320375	0.0281501	0.662198	0.0134048
A. kikuchii	0.292	0.102	0.008	0.024	0.114	0.002	0.312	0.186	0.27	1	0.054	0.124	0.172	0.078	0.274	0.338	0.022		0	0.11126	0	0.00938338	0.668901	0.191689	0	0	0
M. levis	1	1	0.03	0.07	0.358	0.026	1	0.208	1	1	0.112	0.346	0.364	0.096	1	1	0.066	1		0	0	0	0.47185	0.0241287	0	0	0
M. ochrogaster	0.312	1	0.002	1	0.07	0.316	1	0.006	0.172	0.224	0.002	0.046	0.016	0.01	0.216	1	0	0.118	1		0.00670241	0	0.580429	0	0.13941	0	0.191689
T. subterraneus	1	1	0.052	0.076	0.298	0.01	1	0.222	1	1	0.094	0.296	0.342	0.18	1	1	0.076	1	1	0.384		0	0.450402	0.0335121	0	0	0
C. glareolus	1	1	0.002	0.26	1	0.102	1	0.028	1	1	0.044	0.25	0.266	0.09	1	1	0.018	0.336	1	1	1		0.402145	0	0	0.0509383	0
N. fuscus	0.028	0.082	1	0.002	0.174	0	0.126	0.058	0.162	0.08	0.242	0.182	0.174	0.126	0.082	0.066	0.056	0	0.002	0.002	0.006	0.01		0.256032	0.308311	1.08981	0.382038
N. irene	1	1	0.098	0.186	1	0.194	1	0.044	1	1	0.114	1	0.244	0.088	0.354	1	0.028	0.066	0.312	1	0.312	1	0.012		0.038874	0.234584	0.0857909
N. sikimensis	1	0.312	0.122	0.006	1	0.002	1	1	1	1	1	1	1	1	1	1	0.308	1	1	0.07	1	1	0.01	0.252		0.175603	0
O. zibethicus	0.112	0.026	0	0.148	0.014	0.008	0.058	0.002	0.016	0.078	0	0.002	0.016	0.002	0.096	0.142	0	1	1	1	1	0.216	0	0.042	0.066		0.168901
P. liangshanensis	1	0.272	0.138	0.012	1	0	1	1	1	1	0.358	1	1	1	1	0.376	0.352	1	1	0.036	1	1	0.008	0.158	1	0.07

## Sheet: RY
Test of the Homogeneity of Substitution Patterns Between Sequences on alignment with RY-coded 3rd codon position. The probability of rejecting the null hypothesis that sequences have evolved with the same pattern of substitution, as judged from the extent of differences in base composition biases between sequences (Disparity Index test, [1]). A Monte Carlo test (500 replicates) was used to estima…
	H. fertilis cytb	A. stoliczkanus	A. tuvinicus	A. amphibius	C. rufocanus	H. fertilis	D. torquatus	E. chinensis	C. inez	E. melanogaster	E. miletus	C. regulus	L. gregalis	L. mandarinus	M. agrestis	M. arvalis	A. fortis	A. kikuchii	M. levis	M. ochrogaster	T. subterraneus	C. glareolus	N. fuscus	N. irene	N. sikimensis	O. zibethicus	P. liangshanensis
H. fertilis cytb		0.0180723	0	0.0321285	0	0.0220884	0	0	0.0281124	0	0	0	0	0	0.0281124	0.00803213	0	0.0160643	0	0.0662651	0	0.0220884	0	0.11245	0.0200803	0.00200803	0
A. stoliczkanus	0.264		0	0	0	0	0.0120482	0.0281124	0.00401606	0.0240964	0	0	0	0	0	0	0.0481928	0	0	0	0	0	0	0.0140562	0	0	0.0140562
A. tuvinicus	1	1		0.0100402	0	0.0060241	0	0	0.0261044	0	0	0	0	0	0	0	0	0	0	0.0220884	0	0.0200803	0	0.0722892	0.00200803	0.00803213	0
A. amphibius	0.186	1	0.276		0	0	0.0421687	0.0240964	0.0522088	0.0160643	0	0	0	0	0	0	0.060241	0.0060241	0	0	0	0.0461847	0	0.0502008	0	0.0401606	0.0321285
C. rufocanus	1	1	1	1		0	0	0	0.00401606	0.00401606	0	0	0	0	0	0	0.0180723	0	0	0	0	0.00803213	0	0.0240964	0	0	0
H. fertilis	0.256	1	0.294	1	1		0.0100402	0.0200803	0	0.0140562	0	0	0	0	0	0	0.0542169	0	0	0	0	0	0	0	0	0	0.0180723
D. torquatus	1	0.238	1	0.092	1	0.276		0	0.0120482	0	0	0	0	0	0.0281124	0.00401606	0	0.00401606	0	0.0441767	0	0.00200803	0	0.0823293	0.0140562	0.0060241	0
E. chinensis	1	0.096	1	0.152	1	0.206	1		0.0481928	0	0	0	0	0	0.0140562	0.00803213	0	0.0160643	0	0.0682731	0	0.0401606	0	0.11245	0.0220884	0.0180723	0
C. inez	0.212	0.372	0.134	0.032	0.362	1	0.234	0.028		0.060241	0.0160643	0	0.0200803	0.0100402	0.0301205	0.00401606	0.0662651	0	0.0200803	0	0.00401606	0	0.0160643	0	0	0	0.0281124
E. melanogaster	1	0.086	1	0.172	0.32	0.246	1	1	0		0	0.00401606	0	0	0.00401606	0	0	0.0240964	0	0.0562249	0	0.0461847	0	0.108434	0.0240964	0.0261044	0
E. miletus	1	1	1	1	1	1	1	1	0.146	1		0	0	0	0	0	0	0	0	0.0160643	0	0.00200803	0	0.0522088	0	0	0
C. regulus	1	1	1	1	1	1	1	1	1	0.338	1		0	0	0	0	0.0180723	0	0	0	0	0.00803213	0	0.0240964	0	0	0
L. gregalis	1	1	1	1	1	1	1	1	0.202	1	1	1		0	0	0	0	0	0	0.0341365	0	0.0060241	0	0.0742972	0	0	0
L. mandarinus	1	1	1	1	1	1	1	1	0.28	1	1	1	1		0.00200803	0	0	0.0100402	0	0.0281124	0	0.0160643	0	0.0522088	0	0	0
M. agrestis	0.212	1	1	1	1	1	0.172	0.264	0.144	0.404	1	1	1	0.416		0	0.0582329	0	0	0	0	0.0140562	0	0.0321285	0	0.00803213	0.0321285
M. arvalis	0.324	1	1	1	1	1	0.348	0.262	0.378	1	1	1	1	1	1		0.0361446	0	0	0	0	0	0	0.0220884	0	0	0.0160643
A. fortis	1	0.062	1	0.04	0.24	0.072	1	1	0.046	1	1	0.224	1	1	0.03	0.078		0.0582329	0	0.11245	0	0.0522088	0.0140562	0.172691	0.062249	0.0441767	0
A. kikuchii	0.27	1	1	0.362	1	1	0.394	0.242	1	0.166	1	1	1	0.29	1	1	0.05		0	0	0	0	0.0060241	0	0	0	0.0261044
M. levis	1	1	1	1	1	1	1	1	0.244	1	1	1	1	1	1	1	1	1		0.0321285	0	0.00200803	0	0.0742972	0	0.00200803	0
M. ochrogaster	0.1	1	0.246	1	1	1	0.114	0.03	1	0.046	0.236	1	0.148	0.238	1	1	0.008	1	0.124		0.0240964	0	0.00803213	0	0	0	0.0763052
T. subterraneus	1	1	1	1	1	1	1	1	0.322	1	1	1	1	1	1	1	1	1	1	0.074		0	0	0.0461847	0	0	0
C. glareolus	0.248	1	0.14	0.05	0.254	1	0.372	0.074	1	0.034	0.37	0.3	0.312	0.324	0.282	1	0.068	1	0.382	1	1		0.0180723	0.0100402	0	0	0.0200803
N. fuscus	1	1	1	1	1	1	1	1	0.27	1	1	1	1	1	1	1	0.272	0.316	1	0.294	1	0.194		0.0562249	0	0.00803213	0
N. irene	0.028	0.258	0.072	0.084	0.124	1	0.018	0.006	1	0.002	0.048	0.198	0.054	0.152	0.192	0.238	0	1	0.048	1	0.096	0.326	0.042		0	0.0160643	0.11245
N. sikimensis	0.242	1	0.34	1	1	1	0.23	0.172	1	0.08	1	1	1	1	1	1	0.036	1	1	1	1	1	1	1		0	0.0220884
O. zibethicus	0.344	1	0.282	0.05	1	1	0.316	0.23	1	0.108	1	1	1	1	0.358	1	0.06	1	0.374	1	1	1	0.302	0.194	1		0.00803213
P. liangshanensis	1	0.302	1	0.146	1	0.234	1	1	0.148	1	1	1	1	1	0.068	0.172	1	0.148	1	0.004	1	0.188	1	0.006	0.174	0.286

## Sheet: 12
Test of the Homogeneity of Substitution Patterns Between Sequences on alignment with excluded 3rd codon position. The probability of rejecting the null hypothesis that sequences have evolved with the same pattern of substitution, as judged from the extent of differences in base composition biases between sequences (Disparity Index test, [1]). A Monte Carlo test (500 replicates) was used to estima…
	H. fertilis cytb	A. stoliczkanus	A. tuvinicus	A. amphibius	C. rufocanus	H. fertilis	D. torquatus	E. chinensis	C. inez	E. melanogaster	E. miletus	C. regulus	L. gregalis	L. mandarinus	M. agrestis	M. arvalis	A. fortis	A. kikuchii	M. levis	M. ochrogaster	T. subterraneus	C. glareolus	N. fuscus	N. irene	N. sikimensis	O. zibethicus	P. liangshanensis
H. fertilis cytb		0.0180723	0	0.0321285	0	0.0220884	0	0	0.0281124	0	0	0	0	0	0.0281124	0.00803213	0	0.0160643	0	0.0662651	0	0.0220884	0	0.11245	0.0200803	0.00200803	0
A. stoliczkanus	0.256		0	0	0	0	0.0120482	0.0281124	0.00401606	0.0240964	0	0	0	0	0	0	0.0481928	0	0	0	0	0	0	0.0140562	0	0	0.0140562
A. tuvinicus	1	1		0.0100402	0	0.0060241	0	0	0.0261044	0	0	0	0	0	0	0	0	0	0	0.0220884	0	0.0200803	0	0.0722892	0.00200803	0.00803213	0
A. amphibius	0.182	1	0.298		0	0	0.0421687	0.0240964	0.0522088	0.0160643	0	0	0	0	0	0	0.060241	0.0060241	0	0	0	0.0461847	0	0.0502008	0	0.0401606	0.0321285
C. rufocanus	1	1	1	1		0	0	0	0.00401606	0.00401606	0	0	0	0	0	0	0.0180723	0	0	0	0	0.00803213	0	0.0240964	0	0	0
H. fertilis	0.238	1	0.344	1	1		0.0100402	0.0200803	0	0.0140562	0	0	0	0	0	0	0.0542169	0	0	0	0	0	0	0	0	0	0.0180723
D. torquatus	1	0.246	1	0.084	1	0.312		0	0.0120482	0	0	0	0	0	0.0281124	0.00401606	0	0.00401606	0	0.0441767	0	0.00200803	0	0.0823293	0.0140562	0.0060241	0
E. chinensis	1	0.09	1	0.146	1	0.216	1		0.0481928	0	0	0	0	0	0.0140562	0.00803213	0	0.0160643	0	0.0682731	0	0.0401606	0	0.11245	0.0220884	0.0180723	0
C. inez	0.178	0.332	0.132	0.05	0.398	1	0.29	0.026		0.060241	0.0160643	0	0.0200803	0.0100402	0.0301205	0.00401606	0.0662651	0	0.0200803	0	0.00401606	0	0.0160643	0	0	0	0.0281124
E. melanogaster	1	0.082	1	0.21	0.32	0.226	1	1	0		0	0.00401606	0	0	0.00401606	0	0	0.0240964	0	0.0562249	0	0.0461847	0	0.108434	0.0240964	0.0261044	0
E. miletus	1	1	1	1	1	1	1	1	0.15	1		0	0	0	0	0	0	0	0	0.0160643	0	0.00200803	0	0.0522088	0	0	0
C. regulus	1	1	1	1	1	1	1	1	1	0.31	1		0	0	0	0	0.0180723	0	0	0	0	0.00803213	0	0.0240964	0	0	0
L. gregalis	1	1	1	1	1	1	1	1	0.218	1	1	1		0	0	0	0	0	0	0.0341365	0	0.0060241	0	0.0742972	0	0	0
L. mandarinus	1	1	1	1	1	1	1	1	0.35	1	1	1	1		0.00200803	0	0	0.0100402	0	0.0281124	0	0.0160643	0	0.0522088	0	0	0
M. agrestis	0.194	1	1	1	1	1	0.156	0.26	0.166	0.362	1	1	1	0.362		0	0.0582329	0	0	0	0	0.0140562	0	0.0321285	0	0.00803213	0.0321285
M. arvalis	0.354	1	1	1	1	1	0.358	0.316	0.31	1	1	1	1	1	1		0.0361446	0	0	0	0	0	0	0.0220884	0	0	0.0160643
A. fortis	1	0.074	1	0.054	0.228	0.072	1	1	0.05	1	1	0.272	1	1	0.008	0.062		0.0582329	0	0.11245	0	0.0522088	0.0140562	0.172691	0.062249	0.0441767	0
A. kikuchii	0.294	1	1	0.336	1	1	0.386	0.31	1	0.17	1	1	1	0.292	1	1	0.042		0	0	0	0	0.0060241	0	0	0	0.0261044
M. levis	1	1	1	1	1	1	1	1	0.26	1	1	1	1	1	1	1	1	1		0.0321285	0	0.00200803	0	0.0742972	0	0.00200803	0
M. ochrogaster	0.096	1	0.228	1	1	1	0.096	0.036	1	0.076	0.246	1	0.122	0.232	1	1	0.014	1	0.124		0.0240964	0	0.00803213	0	0	0	0.0763052
T. subterraneus	1	1	1	1	1	1	1	1	0.386	1	1	1	1	1	1	1	1	1	1	0.076		0	0	0.0461847	0	0	0
C. glareolus	0.254	1	0.128	0.056	0.272	1	0.41	0.086	1	0.04	0.388	0.236	0.302	0.298	0.26	1	0.094	1	0.378	1	1		0.0180723	0.0100402	0	0	0.0200803
N. fuscus	1	1	1	1	1	1	1	1	0.292	1	1	1	1	1	1	1	0.24	0.286	1	0.306	1	0.23		0.0562249	0	0.00803213	0
N. irene	0.03	0.254	0.068	0.066	0.15	1	0.018	0.01	1	0	0.048	0.158	0.044	0.156	0.158	0.234	0	1	0.06	1	0.13	0.358	0.038		0	0.0160643	0.11245
N. sikimensis	0.236	1	0.392	1	1	1	0.248	0.204	1	0.098	1	1	1	1	1	1	0.028	1	1	1	1	1	1	1		0	0.0220884
O. zibethicus	0.422	1	0.318	0.07	1	1	0.318	0.222	1	0.106	1	1	1	1	0.368	1	0.088	1	0.366	1	1	1	0.308	0.158	1		0.00803213
P. liangshanensis	1	0.274	1	0.158	1	0.256	1	1	0.14	1	1	1	1	1	0.104	0.212	1	0.124	1	0.004	1	0.224	1	0.002	0.206	0.346
