# Supplementary material for: Phylogenetic relationships and taxonomic position of genus Hyperacrius (Rodentia: Arvicolinae) from Kashmir based on evidences from analysis of mitochondrial genome and study of skull morphology
Source: PeerJ. 2020 Nov 18;8:e10364. doi: 10.7717/peerj.10364 (PMC7680025; doi:10.7717/peerj.10364)
Supplement: Supplemental Information 9 [file peerj-08-10364-s009.xlsx]

## Sheet: Лист1
Table S5. IQTREE chi-square nucleotide composition tests
Sequences	Complete dataset (all three codon positions)			RY-coded 3rd position			1-2 positions (3rd skipped)
	Gap/Ambiguity	Composition	p-value	Gap/Ambiguity	Composition	p-value	Gap/Ambiguity	Composition	p-value
H. fertilis cytb	93.13%	passed	75.11%	95.42%	passed	49.34%	93.13%	passed	53.70%
A. stoliczkanus	90.04%	passed	41.68%	93.36%	passed	65.85%	90.04%	passed	67.17%
A. tuvinicus	93.13%	passed	18.46%	95.42%	passed	43.68%	93.13%	passed	45.10%
A. amphibius	0.00%	failed	0.00%	33.33%	passed	5.66%	0.00%	passed	94.97%
C. rufocanus	5.07%	failed	0.03%	36.70%	failed	0.24%	5.06%	passed	25.87%
H. fertilis	32.05%	failed	0.00%	54.62%	failed	1.18%	31.93%	passed	8.71%
D. torquatus	0.00%	passed	17.69%	33.33%	failed	3.43%	0.00%	passed	85.37%
E. chinensis	0.00%	passed	77.90%	33.33%	passed	7.86%	0.00%	passed	97.77%
C. inez	0.01%	passed	22.74%	33.33%	failed	4.01%	0.00%	passed	72.11%
E. melanogaster	0.00%	passed	94.36%	33.33%	passed	11.17%	0.00%	passed	99.13%
E. miletus	0.00%	passed	24.30%	33.33%	passed	14.38%	0.00%	passed	99.21%
C. regulus	0.00%	passed	90.86%	33.33%	passed	6.54%	0.00%	passed	99.71%
L. gregalis	0.00%	failed	4.36%	33.33%	passed	11.42%	0.00%	passed	93.39%
L. mandarinus	0.00%	passed	67.96%	33.33%	failed	3.20%	0.00%	passed	96.88%
M. agrestis	0.00%	passed	96.25%	33.33%	passed	11.83%	0.00%	passed	97.44%
M. arvalis	0.00%	passed	49.10%	33.33%	passed	24.05%	0.00%	passed	96.26%
A. fortis	0.00%	passed	5.91%	33.33%	failed	3.70%	0.00%	passed	81.04%
A. kikuchii	0.00%	failed	4.35%	33.33%	passed	12.27%	0.00%	passed	90.14%
M. levis	0.00%	passed	28.39%	33.33%	passed	20.61%	0.00%	passed	95.67%
M. ochrogaster	0.00%	passed	93.34%	33.33%	passed	6.59%	0.00%	passed	98.42%
T. subterraneus	0.00%	passed	82.51%	33.33%	passed	16.52%	0.00%	passed	97.09%
C. glareolus	0.00%	passed	70.36%	33.33%	passed	6.59%	0.00%	passed	94.86%
N. fuscus	0.00%	failed	0.02%	33.33%	passed	10.56%	0.00%	passed	73.22%
N. irene	0.00%	passed	38.01%	33.33%	passed	11.55%	0.00%	passed	96.29%
N. sikimensis	0.00%	passed	22.20%	33.33%	passed	9.74%	0.00%	passed	98.02%
O. zibethicus	0.00%	failed	0.00%	33.33%	failed	1.03%	0.00%	passed	22.89%
P. liangshanensis	0.00%	passed	46.23%	33.33%	passed	10.93%	0.00%	passed	83.82%
Total	11.61% 7 sequences failed composition chi2 test (p-value<5%; df=3)			41.07% 7 sequences failed composition chi2 test (p-value<5%; df=3)			11.60% 0 sequences failed composition chi2 test (p-value<5%; df=3)
